# Supplementary material
Source: Springer Nature journal article supplement (https://www.springermedizin.de/resource/supplementary/13045_2013_322_MOESM3_ESM.pdf/9661106)
Supplement: MOESM3 [file 9661106]

## PFS according to treatment

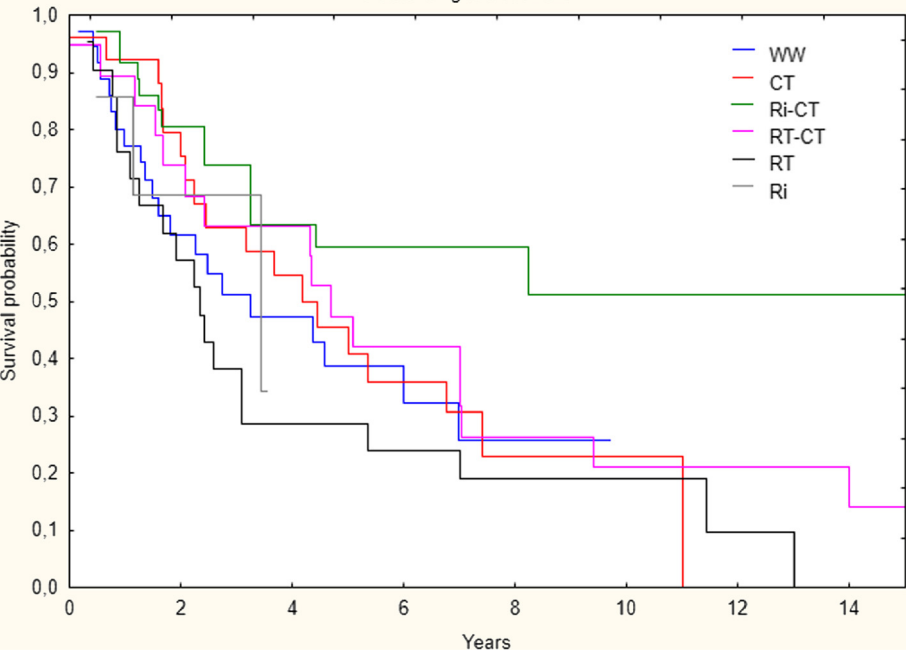

WW: watch and wait, Ri-CT: rituximab + chemotherapy ; RT: radiotherapy; RT-CT: radiotherapy+ chemotherapy; CT: chemotherapy alone; Ri: immunotherapy alone.
